# Supplementary material
Source: publisher figshare collection journal article supplement (https://acs.figshare.com/ndownloader/files/3594609)
Supplement: Supplementary file 1 [file 3594609]

# Different Plasmon Sensing Behavior of Silver and Gold Nanorods

Mahmoud A. Mahmoud, Mostafa A El-Sayed \*

*Laser Dynamics Laboratory, School of Chemistry and Biochemistry, Georgia Institute of Technology,  
Atlanta, Georgia 30332-0400*

\*E-mail: melsayed@gatech.edu

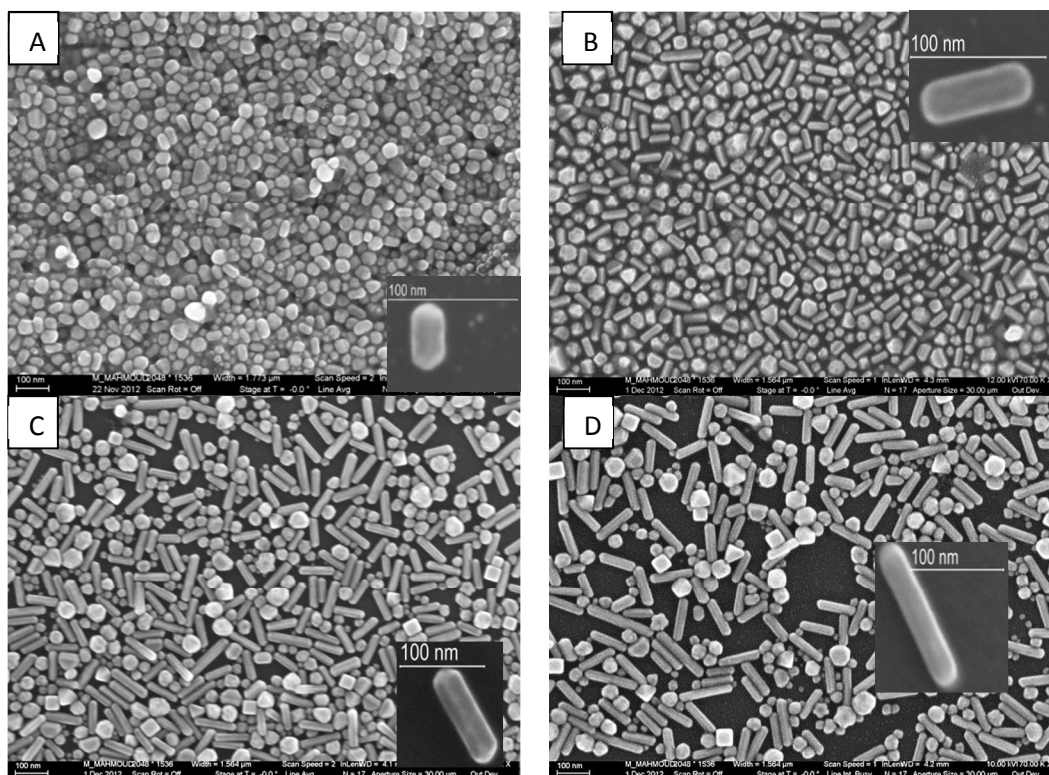

Figure S1 SEM images of silver nanorods of different length A)  $39.6 \pm 3.2$ , B)  $55.5 \pm 5.5$ , C)  $73.5 \pm 7.8$ , and D)  $101.1 \pm 12.4$ . The insets show the magnified images of single nanorods. The scale bars in all the images are 100 nm.

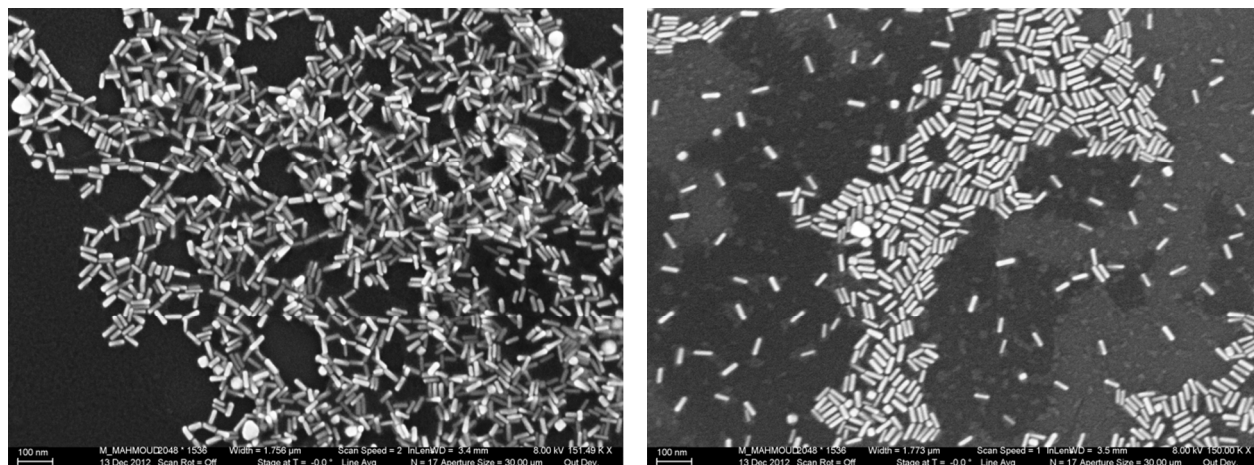

Figure S2 SEM of AuNRs of aspect ratio of  $3.2 \pm 0.34$  (left) and  $3.5 \pm 0.41$  (right).

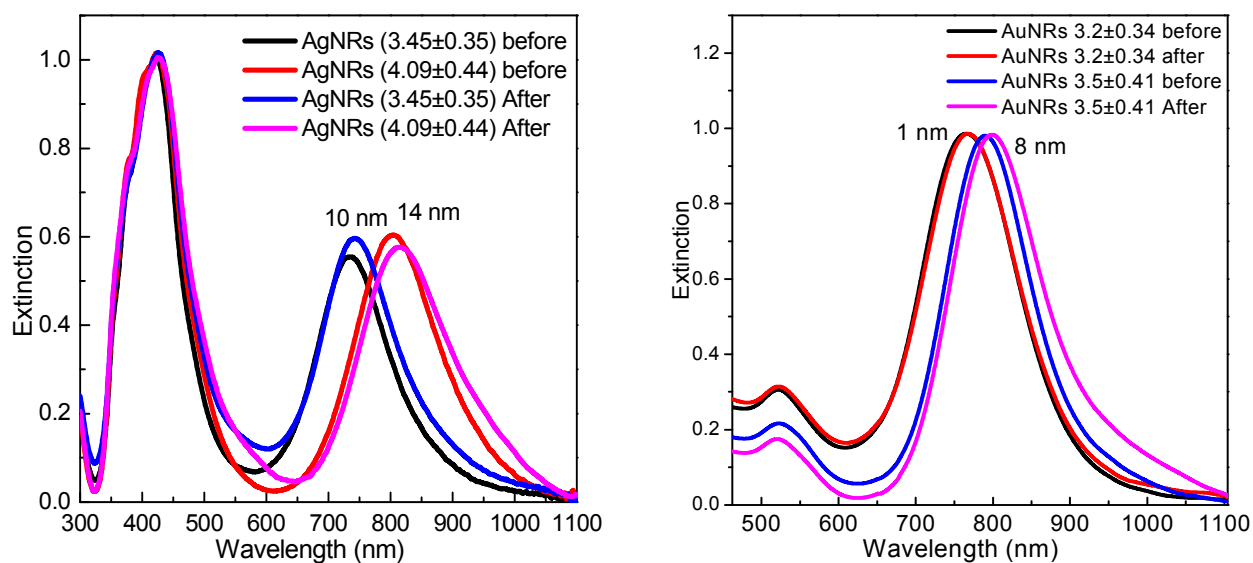

Figure S3 LSPR spectra of AgNRs and AuNRs after and before coating with p-nitrothiophenol, red shift in the LSPR peak were observed in both AgNRs and AuNRs.

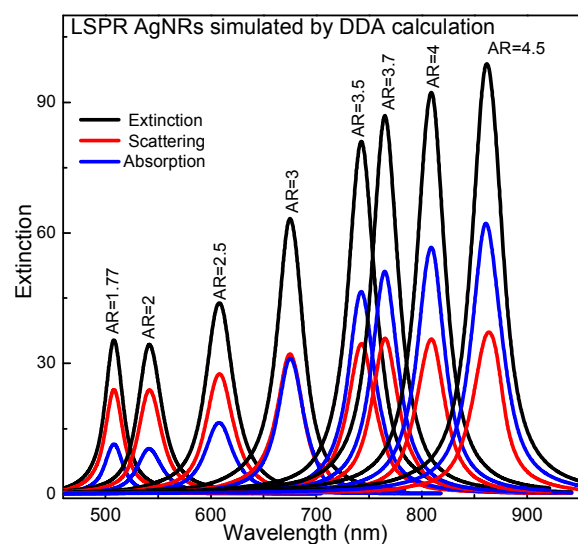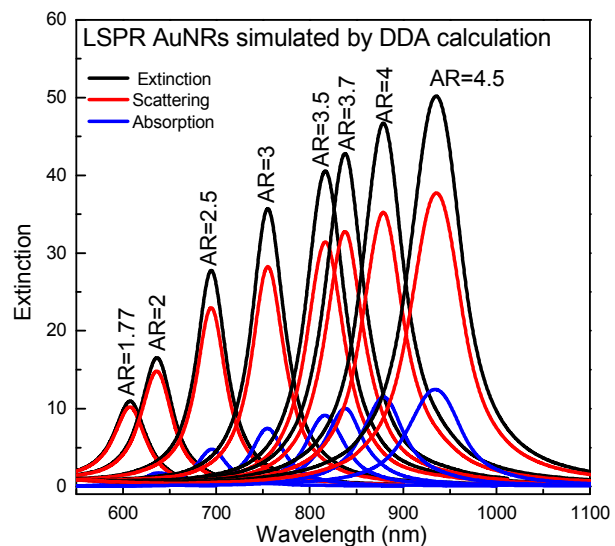

Figure S4 The LSPR extinction (black), Scattering (red), and Absorption (blue), of silver nanorods and gold nanorods with different aspect ratios calculated by the DDA calculation.
